# Supplementary material for: Isca, v1.0: A Framework for the Global Modelling of the Atmospheres of Earth and Other Planets at Varying Levels of Complexity
Source: Copernicus journal article supplement (doi:10.5194/gmd-2017-243), 2017-11-02
Supplement: Supplementary file 1 [file Moist_model_code_structure_FMS2013.xlsx]

## Sheet: 2013_model_structure
Atmos_model	atmos_model.F90
	atmosphere	atmosphere.f90
		idealized_moist_phys	idealized_moist_phys.F90
			qe_moist_convection	qe_moist_convection.F90
			lscale_cond	lscale_cond.F90
			two_stream_gray_rad_down	two_stream_gray_rad.F90
			surface_flux	surface_flux.F90
				mo_drag	monin_obukhov.F90
			two_stream_gray_rad_up	two_stream_gray_rad.F90
			vert_turb_driver
				diffusivity	diffusivity.F90
					pbl_depth	diffusivity.F90
					diffusivity_pbl	diffusivity.F90
			gcm_vert_diff_down	vert_diff.F90
			mixed_layer	mixed_layer.F90
		spectral_dynamics	spectral_dynamics.F90
		compute_pressures_and_heights	press_and_geopot.F90
		spectral_diagnostics	spectral_dynamics.F90
File locations
atmos_model.F90	src/atmos_solo/
atmosphere.f90	src/atmos_spectral/driver/solo
idealized_moist_phys.F90	src/atmos_spectral/driver/solo
qe_moist_convection.F90	src/atmos_param/qe_moist_convection/
lscale_cond.F90	src/armos_param/lscale_cond/
two_stream_gray_rad.F90	src/armos_param/two_stream_gray_rad
surface_flux.F90	src/coupler/
monin_obukhov.F90	src/atmos_param/monin_obukhov/
diffusivity.F90	src/atmos_param/diffusivity/
vert_diff.F90	src/atmos_param/vert_diff/
mixed_layer.F90	src/armos_spectral/driver/solo/
spectral_dynamics.F90	src/atmos_spectral/model/
press_and_geopot.F90	src/atmos_spectral/model/
						Key
						Bold text signifies a subroutine name
						Italic text horizontaly to the right of bold text indicates the file where such a subroutine is to be found
						A bold entry down and to the right of a previous bold entry signifies a call to a subroutine made in the subroutine up and to its left
						e.g.
						physics_driver_up	physics_driver.f90
							vert_diff_driver_up
							moist_processes
						indicates that vert_diff_driver_up and moist_processes are called within physics_driver_up , but vert_diff_driver_up is done first.

## Sheet: 2006_model_structure
Coupler_main	coupler_main.f90
	Compute flux	simple_surface.f90
		Surface_flux	surface_flux.f90
			Mo_drag	monin_obukhov.f90
	Update_atmos_model_down	atmos_model.f90
		atmosphere_down	atmosphere.f90
			spectral_physics_down	spectral_physics.f90
				physics_driver_down	physics_driver.f90
					grey_radiation	grey_radiation.f90
					vert_turb_driver	vert_turb_driver.f90
						diffusivity	diffusivity.f90
							pbl_depth	diffusivity.f90
							diffusivity_pbl	diffusivity.f90
								mo_diff	monin_obukhov.f90
					atmos_tracer_driver	atmos_tracer_driver.f90
					diffusion_smooth	part of physics_driver.f90
					vert_diff_driver_down	vert_diff_driver.f90
	Update Simple Surface	simple_surface.f90
	Update_atmos_model_up	atmos_model.f90
		atmosphere_up	atmosphere.f90
			spectral_physics_up	spectral_physics.f90
				physics_driver_up	physics_driver.f90
					vert_diff_driver_up	vert_diff_driver.f90
					moist_processes	moist_processes.f90
						qe_moist_convection	qe_moist_convection.f90
							simple_sat_vapor_press	simple_sat_vapor_pres.f90
						lscale_cond	lscale_cond.f90
			spectral_dynamics	spectral_dynamics.f90
			spectral_diagnostics	spectral_dynamics.f90
			compute_pressures_and_heights	press_and_geopot.f90
			compute_z_bot	press_and_geopot.f90
						Key
						Bold text signifies a subroutine name
						Italic text horizontaly to the right of bold text indicates the file where such a subroutine is to be found
						A bold entry down and to the right of a previous bold entry signifies a call to a subroutine made in the subroutine up and to its left
						e.g.
						physics_driver_up	physics_driver.f90
							vert_diff_driver_up
							moist_processes
						indicates that vert_diff_driver_up and moist_processes are called within physics_driver_up , but vert_diff_driver_up is done first.

## Sheet: Explanation_of_subroutines
Subroutine name	What does it do?
atmos_model	a very simple subroutine that initialises atmosphere and fms, then runs atmosphere, and that's it.
atmosphere	Does everything. Runs idealized_moist_phys, spectral dynamics, compute pressures and heights, and spectral diagnostics.
idealized_moist_phys	Does all of the physics in the simplified model, apart from spectral_dynamics etc.
qe_moist_convection
lscale_cond
two_stream_gray_radiation_down	Calculates the downward fluxes separately from the upward fluxes, which just appears to be a separation of what was in old grey_radiation.f90
two_stream_gray_radiation_up	Calculates the downward fluxes separately from the upward fluxes, which just appears to be a separation of what was in old grey_radiation.f90
surface_flux	sets up various things required by mo_drag, then calls it, then uses C coeffs to calculate sensible heat flux and evaporation etc
mo_drag	calculates drag coefficients from MO stability theory
vert_turb_driver
diffusivity	container for call to pbl_depth, and then calculates vertical diffusivities through diffusivity_pbl
pbl_depth	simple interpolation to find pbl height where Ri=1, as in Frierson's thesis
diffusivity_pbl	diffusivities calculated using mo_diff
mo_diff	calculates vertical diffusivities in the boundary layer, as in Frierson's thesis
gcm_vert_diff_down	This is the same setup as in FMS 2006's vert_diff_driver. Do_conserve_energy is hard-coded in, and virtual_temp in idealized moist phys namelist sets the same option as 2006's variable use_virtual_temp_vert_diff. Also no *_mcm_* options in 2013 one, which were in 2006 one.
mixed_layer	mixed_layer is akin to the old simple_surface, but it looks to have had quite a lot of features removed. Definitely one to investigate
spectral_dynamics	Not gone into this yet!
spectral_diagnostics	Not gone into this yet!
compute_pressures_and_heights	Not gone into this yet!
sat_vapor_pres	Can calculate saturation vapor pressure either using the simple version of specifiic humidity used by Frierson, or the other way, and this is changed with the flag do_simple=.true. In the old code these options were chosen by using either simple_sat_vapor_pres_mod of sat_vapor_pres_mod, with the former used in qe_moist_convection. So do_simple should be .true. in sat_vapor_pres_nml.
Old routine explanations
compute_flux	sets up albedo and surface roughness, then calls surface_flux
surface_flux	sets up various things required by mo_drag, then calls it, then uses C coeffs to calculate sensible heat flux and evaporation etc
mo_drag	calculates drag coefficients from MO stability theory
update_atmos_model_down	basically just a container for the call to atmosphere_down
atmosphere_down	basically just a container for the call to spectral_physics_down
spectral_physics_down	basically just a container for the call to physics_driver_down
physics_driver_down	contains calls to lots of things we're not using, then calls grey_radiation, then damping_driver (this applies Rayleigh drag, not used), vert_turb_driver, atmos_tracer_driver, smooths the diffusion coefficients in time, applies the vertical diffusion in vert_diff_driver_down, and then it is done.
grey_radiation	Works out temperature tendancies due to grey radiation, including absorption of solar sw.
vert_turb_driver	has options for lots of things we don't use, but eventually calls diffusivity
diffusivity	container for call to pbl_depth, and then calculates vertical diffusivities through diffusivity_pbl
pbl_depth	simple interpolation to find pbl height where Ri=1, as in Frierson's thesis
diffusivity_pbl	diffusivities calculated using mo_diff
mo_diff	calculates vertical diffusivities in the boundary layer, as in Frierson's thesis
atmos_tracer_driver	Not gone into this yet!
diffusion_smooth	Not a subroutine, but part of physics_driver_down. Does an implicit smoothing of the diffusion coefficients in time.
vert_diff_driver_down	Calculates the first guess at tendancies due to diffusion
update_simple_surface	calculates the sst temperature of the slab ocean, accounting for radiation and diffusion of heat.
update_atmos_model_up	container for call to atmosphere_up
atmosphere_up	container for call to spectral_physics_up, spectral_dynamics, spectral_diagnostics, compute_pressures_and_heights, and compute_z_bot. Also does compute_robert_filter.
spectral_physics_up	container for call to physics_driver_up
physics_driver_up	container for calls to vert_diff_driver_up and moist_processes
vert_diff_driver_up	must be calculation of tendancies due to diffusion on the second pass
moist_processes	has options for loads of convection schemes we don't use. Only ones we use are the simplified betts-miller scheme in qe_moist_convection, and lscale_cond
qe_moist_convection	simplified betts-miller scheme as in Frierson 2007 and thesis chapter 7, including modifications by O'Gorman & Schneider 2008. N.B. uses the shallower of the shallow convection schemes in Frierson's thesis
simple_sat_vapor_pres	This calculates the saturation vapor pressure given an input temperature. It DOESN't use a lookup table though, but calculates it explicitely, unlike the original sat_vapor_pres.f90 code.
lscale_cond	large scale condensation scheme, as in Frierson's thesis
spectral_dynamics	Not gone into this yet!
spectral_diagnostics	Not gone into this yet!
compute_pressures_and_heights	Not gone into this yet!
compute_z_bot	Not gone into this yet!

## Sheet: Parameters_in_Fr06_tab_1
Parameter in Frierson 2006 table 1	Explanation	Value in Frierson 2006 table 1	Model variable name	File where value set	Comments
v	hyperdiffusion coefficient	10^16	damping_coeff	core.nml
r	Robert coefficient	0.03	robert_coeff	core.nml
omega	Earth rotation rate	7.292 e-5	omega	constants.f90
g	gravitational acceleration	9.8	grav	constants.f90
a	Earth Radius	6376000	radius	constants.f90
c_p	specific heat of dry air	1004.64	cp_air	constants.f90
R_d	Gas constant for dry air	287.04	rdgas	constants.f90
P_s0	Mean atmospheric surface pressure	100000
C_o	Oceanic mixed layer heat capacity	10000000	heat_capacity	phys.nml
kappa	von Karman constant	0.4	vonkarm	constants.f90
z_0	roughness length	3.21e-05	const_roughness	phys.nml
Ri_c	Critical richardson number for stable mixing cutoff	1	rich_crit_pbl	phys.nml/diffusivity.f90
f_0	surface layer fraction (fraction of pbl height that has constant flux)	0.1	frac_inner	phys.nml/diffusivity.f90
R_s0	Net solar constant (including albedo)	938.4	solar_constant*(1-const_albedo)	phys.nml	solar_constant=1360 and const_albedo=0.31, both in phys.nml
\Delta s	Lat. Variation of sw radiation	1.4	del_sol	phys.nml
Tau_0e	Lw optical depth at the equator	6	ir_tau_eq	phys.nml
Tau_0p	Lw optical depth at the pole	1.5	ir_tau_pole	phys.nml
f_l	Linear optical depth parameter (for strat)	0.1	linear_tau	phys.nml/grey_radiation.f90
sigma	Stefan-Boltzman constant	5.6734e-08	stefan	constants.f90
L_v	latent heat of vaporisation for water	2500000	hlv	constants.f90
R_v	Gas constant for water vapor	461.5	rvgas	constants.f90
e_0*	Sat vapor pressure at 273.16K	610.78	e0	simple_sat_vapor_pressure.f90	This one is complicated, because 610.78Pa is defined at TFREEZE=273.16K, with TFREEZE set in constants.f90. THEN there is also es0 that is also set as a constant in constants.f90, which is a multple of 610.78Pa in both simple_sat_vapor_pressure.f90 and moist_processes.f90.
Other relevant parameters	Explanation	Value in Frierson's work	model variable name	file where value is set	Comments
tau_sw0	absorption of incoming solar radiation	0.2	atm_abs	phys.nml	This parameter is not present in Frierson2006, but is introduced in his thesis section 7.3 and in Frierson2007. Value of 0.2 set in thesis section 7.3.1.
rhbm	Reference relative humidity used in simplified Betts miller scheme	0.7	rhbm	phys.nml	Note that the qe_moist_convection_nml value of rhbm must be used, and not that under betts_miller_nml
tau_bm	timescale for relaxation to given profiles in simplified betts miller scheme	7200 seconds	tau_bm	phys.nml	Note that the qe_moist_convection_nml value of tau_bm must be used, and not that under betts_miller_nml
Parameters with different values in Frierson2005 chapter 7
albedo		0.38	const_albedo	two_stream nml	Set in section 7.3.1.
roughness_mom, heat, moist		3.21e-5 in 2006 model	roughness_mom, _heat, _moist	idealized_moist_phys_nml

## Sheet: parameter_correspondance
Parameter	Comments	value in Frierson	old model name	FMS2013 name	old place defined	new place defined
albedo		0.38		const_albedo	simple_surface_nml	two_stream nml
roughness_mom, heat, moist		3.21e-5 in 2006 model	constant_roughness	roughness_mom, _heat, _moist	simple_surface_nml	idealized_moist_phys_nml
layer heat capacity		10000000	heat_capacity	depth	simple_surface_nml	mixed_layer_nml defines depth, and constants.f90 defines density and heat capacity.
All relevant grey rad params same in both models
old moist_processes_nml not relevant as automatically does qe_moist_convection
qe_moist_convection_nml same parameters as before
monin_obukhov same params as before - note relax_time was not implemented in previous model so not included in 2013
use_df_stuff	in lscale_cond	TRUE	use_df_stuff	do_simple	lscale_cond	lscale_cond
do_conserve_energy	in vert_diff	TRUE	do_conserve_energy	hard -wired as true in idealized_moist_phys call to vert_diff_init
do_virtual_temp_vert_diff		FALSE	do_virtual_temp_vert_diff	do_virtual	vert_diff_driver_nml	idealized_moist_phys_nml

## Sheet: diag_table
Module name	Field name	Output Field Name	Type of averaging				Precision of output	Notes
dynamics,	temp,	temp	atmos_avg	all	TRUE	none	2
simple_surface,	t_surf	t_surf	atmos_avg	all	TRUE	none	2
physics_driver,	pbltop	pbltop	atmos_avg	all	TRUE	none	2	DOESN'T WORK
vert_turb,	z_pbl	z_pbl	atmos_avg	all	TRUE	none	2	DOES WORK
grey_radiation,	swdn_toa	swdn_toa	atmos_avg	all	TRUE	none	2
Notes
Module name is the name of the first argument of the register_diag_field function that registered that particular variable.
Note that the variable name used in diag_table is whatever it was called when register_diag_field was called, not necessarily the variable name in the model, or the variable name in the send_data command.
For example, pbltop is the boundary layer height variable name in physics driver, and is used in send_data. But the variable was registered in vert_turb with the name z_pbl, and it is this that works correctly.
Another example is t_surf, which is the same as sst.
